# Supplementary material for: The Influence of Prediagnosis Alcohol Consumption and the Polymorphisms of Ethanol-Metabolizing Genes on the Survival of Head and Neck Cancer Patients
Source: Oxford University Press journal article supplement (doi:10.1158/1055-9965.epi-18-0425), 2018-10-01

Supplementary Figure 1. Kaplan-Meier plot for comparing the overall survival of head and neck cancer between never/occasional alcohol drinkers and ever drinkers

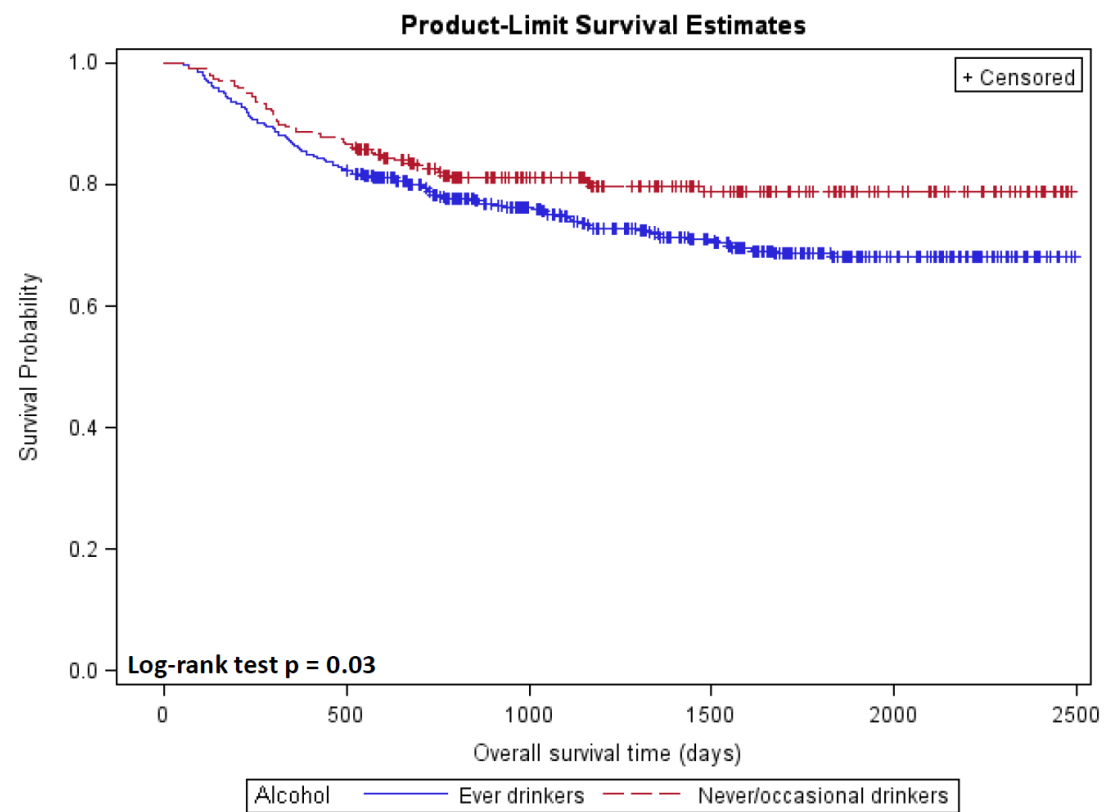

Supplementary Figure 2. Kaplan-Meier plot for the overall survival of head and neck cancer patients by the frequency of pre-diagnosis alcohol drinking

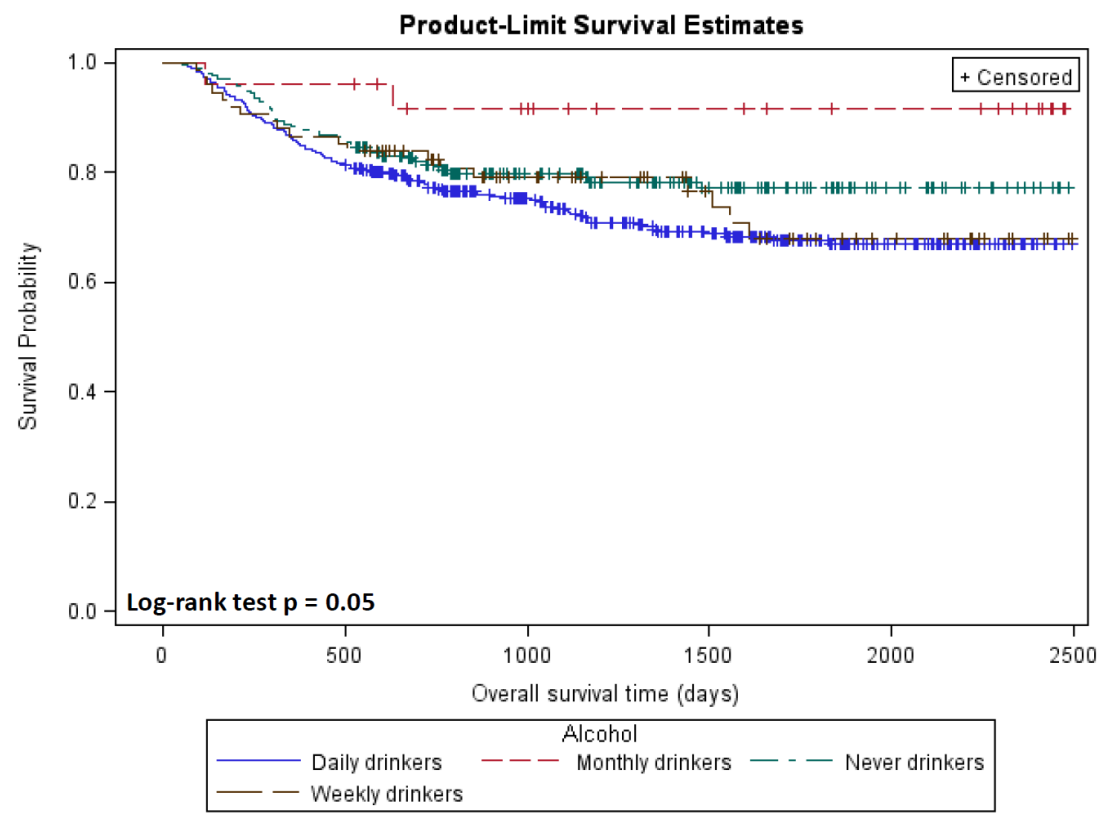

Supplementary Figure 3. Kaplan-Meier plot for the overall survival of head and neck cancer patients by the amount of pre-diagnosis alcohol drinking

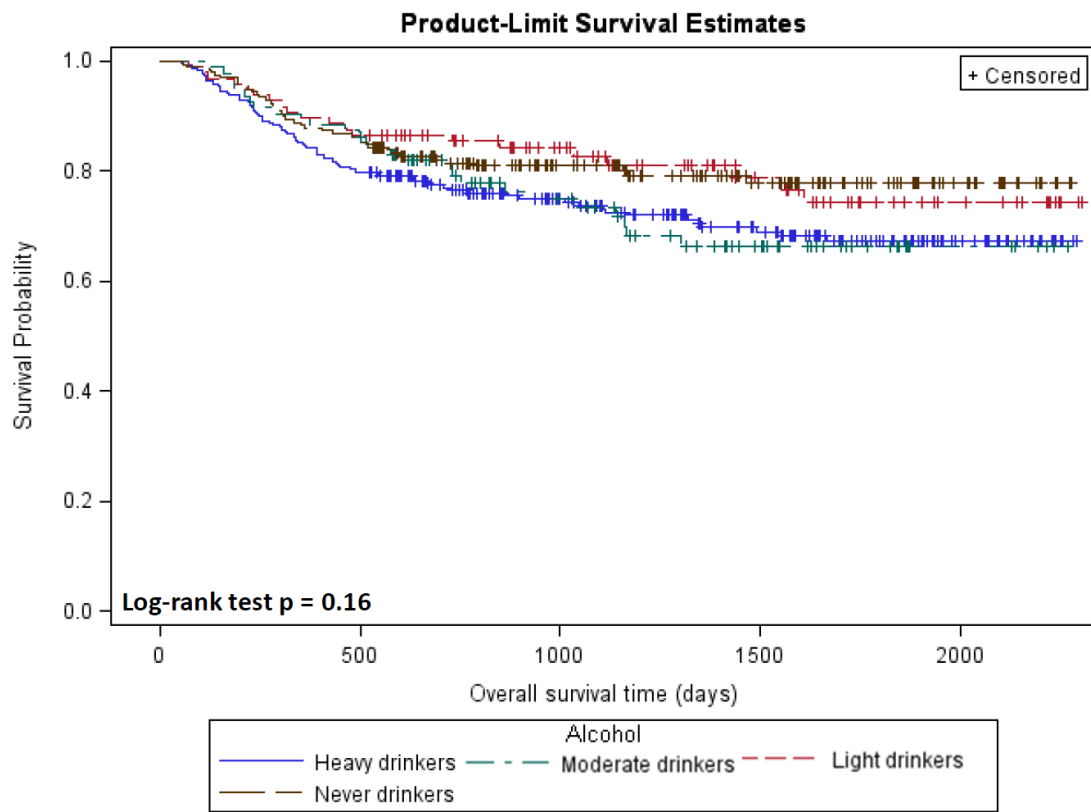

Supplementary Figure 4. Kaplan-Meier plot for the overall survival of head and neck cancer patients by the drink-years of pre-diagnosis alcohol drinking

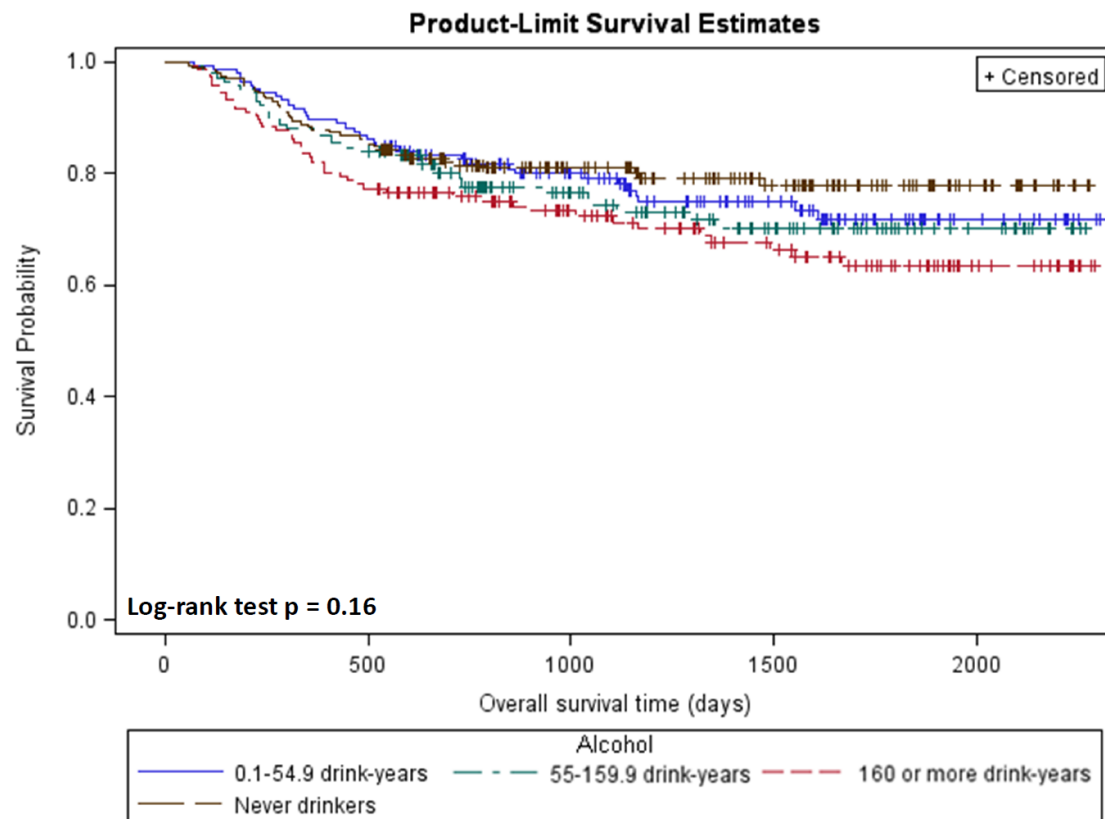

Supplementary Figure 5. Kaplan-Meier plot for the overall survival of head and neck cancer patients by pre-diagnosis alcohol drinking status and combinations of *ADH1B* and *ALDH2* genotypes

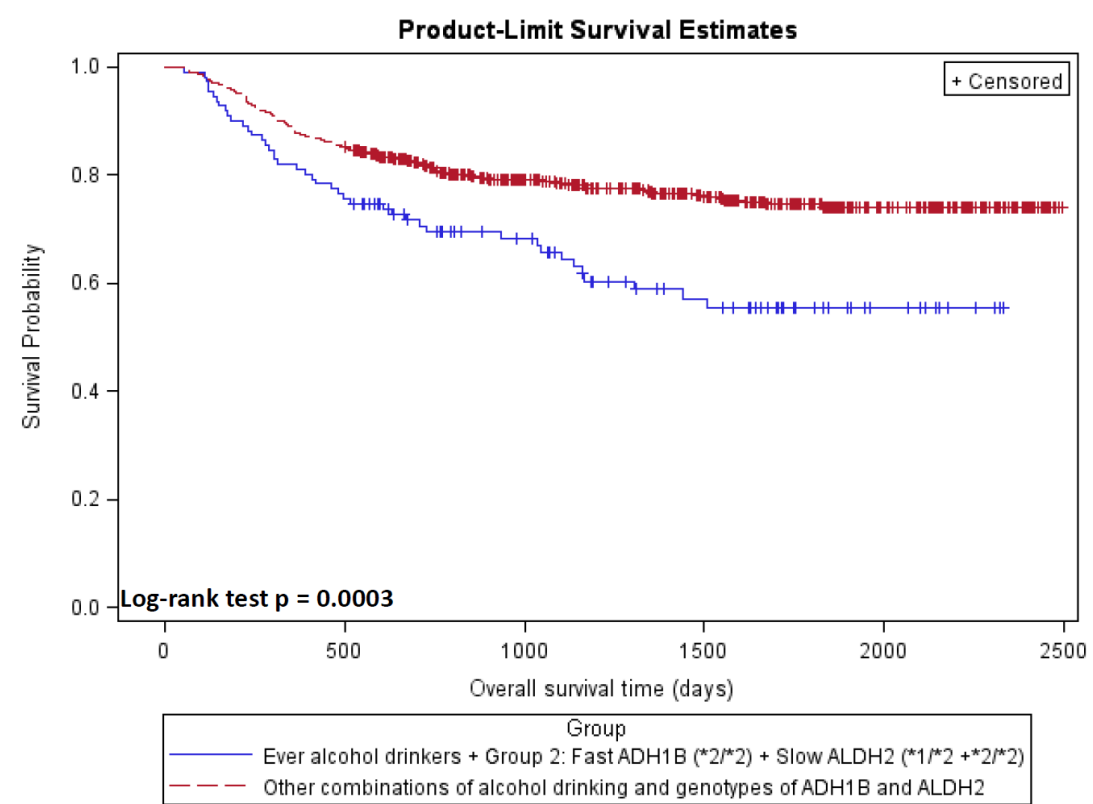

Supplement: 10559965epi180425-sup-200353_2_supp_4967878_pdjhx3.pdf [file 10559965epi180425-sup-200353_2_supp_4967878_pdjhx3.pdf]
